# Supplementary material
Source: publisher figshare collection journal article supplement (https://frontiersin.figshare.com/ndownloader/files/25742975)
Supplement: Supplementary file [file 25742975]

## SUPPLEMENTARY MATERIAL

### Supplementary figures

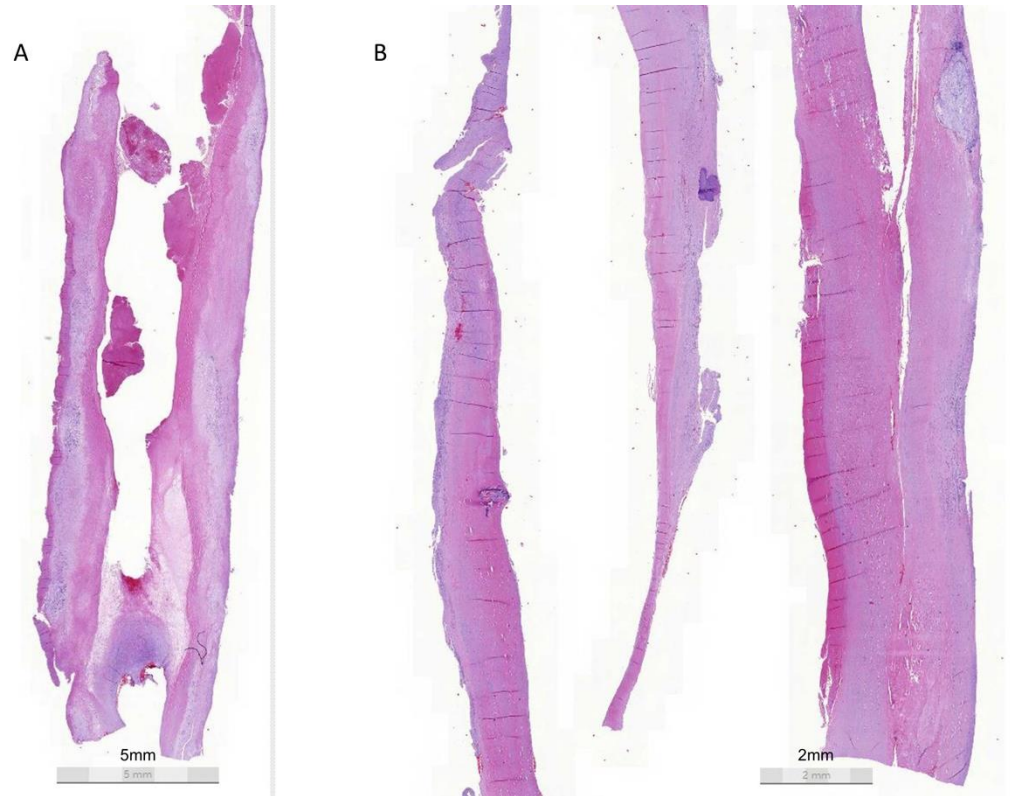

Supplementary figure I. H&E stained slides of plaques from 2 patients showing a low level of dysmorphia and no osteoid metaplasia (OM). (A) An overview of the whole slide. (B) A magnified view of a plaque with little dysmorphia.

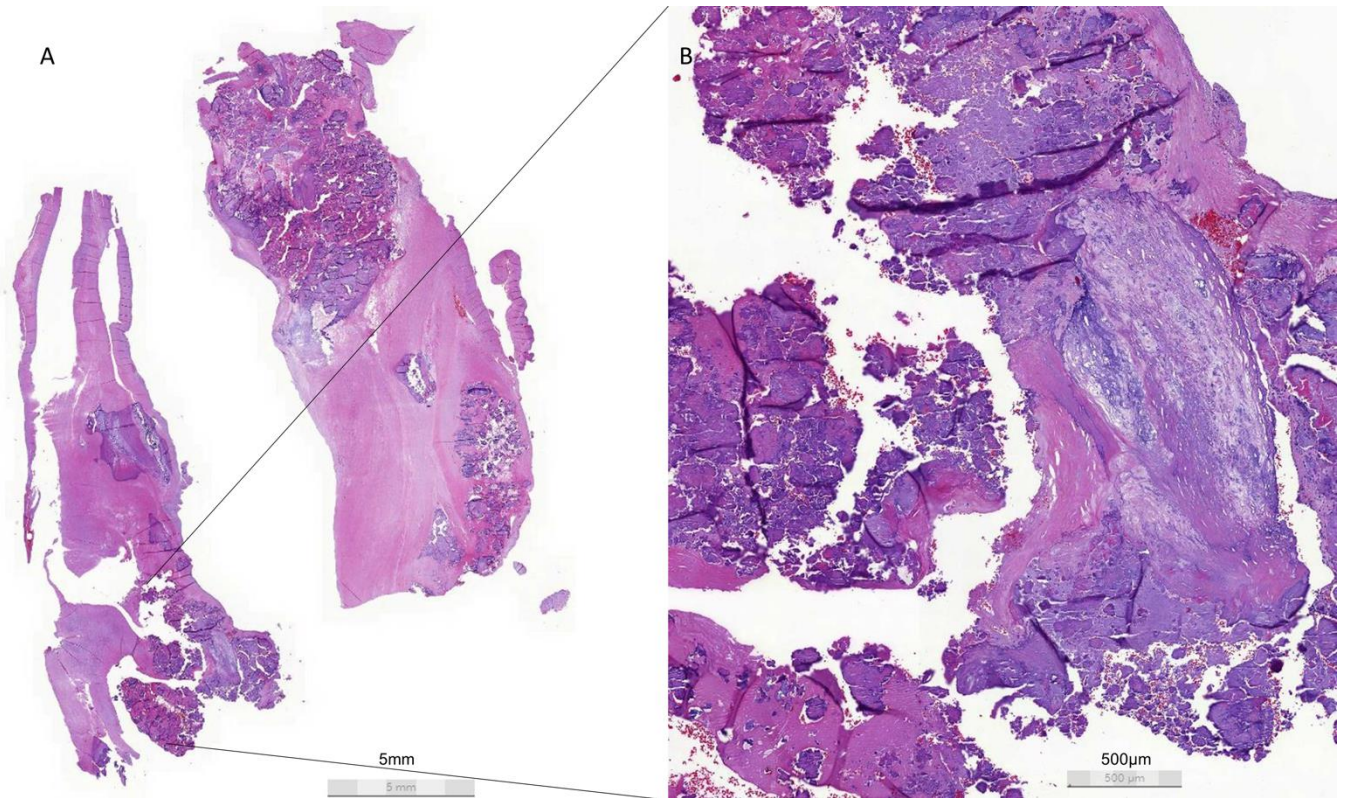

Supplementary figure II. An example of a plaque from one patient showing a high level of dysmorphia and calcification but no OM. (A) Overview of the slide. (B) Magnified view of a dysmorphic and calcified region.

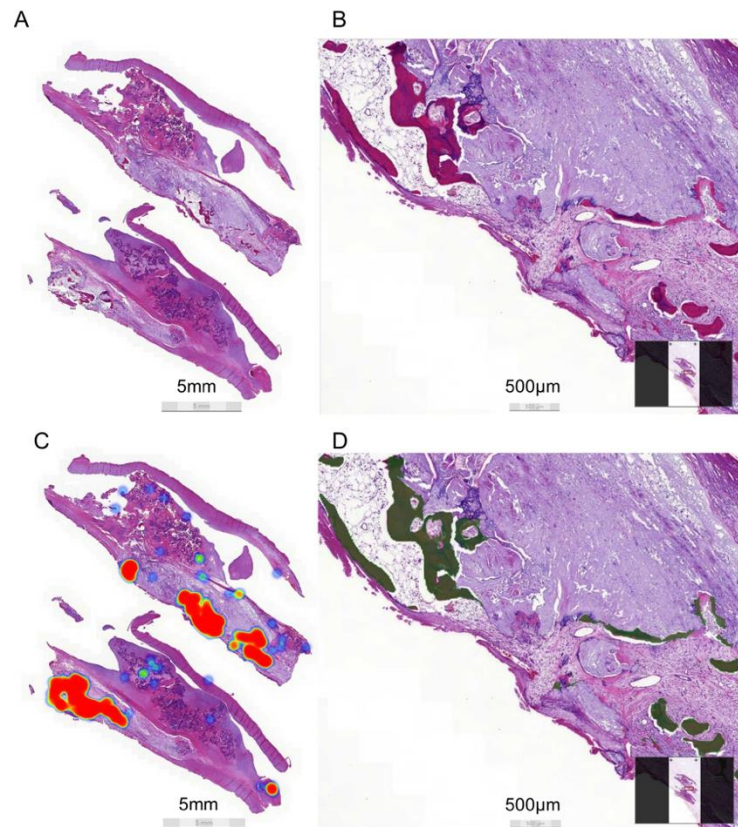

Supplementary figure III. A femoral artery plaque containing osteoid metaplasia (OM) from one patient. (A) Overview of the plaque structure revealing significant dysmorphia of the vessel wall. (B) A magnified view of the outer section of the slide showing osteoid metaplasia. (C) A heatmap view of the slide showing the areas in red that contain OM. (D) A magnified view of the same part of the slide as in B with OM areas in green as recognised by the algorithm.

**Supplementary Table I**

**Differences in baseline characteristics between patients with OM and patients without OM among female and male patients**

|                                               | Female         |                |          | Male |       |                |                |          |       |             |
|-----------------------------------------------|----------------|----------------|----------|------|-------|----------------|----------------|----------|-------|-------------|
|                                               | OM-            | OM+            | <i>p</i> | OR   | 95%CI | OM-            | OM+            | <i>p</i> | OR    | 95%CI       |
| n                                             | 17 (50.0)      | 17 (50.0)      |          |      |       | 22 (39.3)      | 34 (60.7)      |          |       |             |
| Age (years)                                   | 71.87 ± 7.02   | 70.84 ± 5.41   | .617     |      |       | 66.57 ± 7.32   | 69.90 ± 6.99   | .144     |       |             |
| BMI (kg/m2)                                   | 23.52 ± 15.39  | 24.66 ± 4.08   | .380     |      |       | 27.61 ± 3.85   | 28.23 ± 18.50  | .936     |       |             |
| Previous invasive treatments for LEAD         | 6 (35.3)       | 10 (58.8)      | .169     |      |       | 13 (59.1)      | 11 (32.4)      | .048     | 0.331 | 0.109-1.008 |
| Severity of LEAD symptoms                     |                |                |          |      |       |                |                |          |       |             |
| claudication                                  | 11 (64.7)      | 11 (64.7)      | 1.000    |      |       | 17 /77.3)      | 18 (52.9)      | .066     |       |             |
| rest pain                                     | 4 (23.5)       | 4 (23.5)       | 1.000    |      |       | 3 (13.6)       | 7 (20.6)       | .724     |       |             |
| ischemic ulcer or gangrene                    | 2 (11.8)       | 2 (11.8)       | 1.000    |      |       | 2 (9.1)        | 9 (26.5)       | .171     |       |             |
| Rest pain/ulcer/gangrene                      | 6 (35.3)       | 6 (35.3)       | 1.000    |      |       | 5 (22.7)       | 16 (47.1)      | .066     |       |             |
| Ankle brachial index                          | 0.36 ± 0.10    | 0.41 ± 0.12    | .285     |      |       | 0.46 ± 0.18    | 0.46 ± 0.24    | .589     |       |             |
| Toe pressure (mmHg)                           | 38.25 ± 24.20  | 46.92 ± 14.38  | .043     |      |       | 48.47 ± 22.20  | 42.68 ± 18.24  | .273     |       |             |
| Riskfactors                                   |                |                |          |      |       |                |                |          |       |             |
| Smoking status                                |                |                |          |      |       |                |                |          |       |             |
| Never                                         | 13 (81.3)      | 16 (94.1)      | .335     |      |       | 0 (0.0)        | 0 (0.0)        | -        |       |             |
| Current smoker                                | 8 (50.0)       | 10 (58.8)      | .611     |      |       | 8 (36.4)       | 13 (39.4)      | .821     |       |             |
| ex- smoker                                    | 5 (31.3)       | 6 (35.3)       | .805     |      |       | 14 (63.6)      | 20 (60.6)      | .821     |       |             |
| Diabetic                                      | 0 (0.0)        | 6 (35.3)       | .018     |      |       | 10 (45.5)      | 15 (44.1)      | .922     |       |             |
| Hypertensive                                  | 14 (82.4)      | 14 (82.4)      | 1.000    |      |       | 17 (77.3)      | 31 (91.2)      | .241     |       |             |
| Dyslipidemia                                  | 14 (82.4)      | 15 (88.2)      | 1.000    |      |       | 20 (90.9)      | 32 (97.0)      | .557     |       |             |
| Coronary artery disease                       | 6 (35.3)       | 5 (29.4)       | .714     |      |       | 6 (27.3)       | 14 (41.2)      | .289     |       |             |
| Cerebrovascular disease                       | 2 (11.8)       | 2 (11.8)       | 1.000    |      |       | 1 (4.5)        | 2 (8.8)        | 1.000    |       |             |
| Medications                                   |                |                |          |      |       |                |                |          |       |             |
| ACE inhibitors/ ATR blockers                  | 10 (58.8)      | 12 (70.6)      | .473     |      |       | 16 (72.7)      | 29 (85.3)      | .310     |       |             |
| Aspirin                                       | 12 (70.6)      | 12 (76.5)      | 1.000    |      |       | 17 (77.3)      | 23 (67.6)      | .436     |       |             |
| Clopidogrel                                   | 2 (11.8)       | 6 (35.3)       | .225     |      |       | 1 (4.5)        | 1 (2.9)        | 1.000    |       |             |
| Statins                                       | 11 (64.7)      | 13 (76.5)      | .452     |      |       | 16 (72.7)      | 24 (70.6)      | .863     |       |             |
| Warfarin                                      | 0 (0.0)        | 0 (0.0)        | -        |      |       | 1 (4.5)        | 4 (11.8)       | .638     |       |             |
| Haemoglobin (g/l)                             | 133.75 ± 11.98 | 130.65 ± 7.31  | .407     |      |       | 140.76 ± 15.58 | 141.56 ± 19.04 | .782     |       |             |
| Total leukocyte count (10E9/l)                | 8.11 ± 2.10    | 8.00 ± 1.50    | .871     |      |       | 8.03 ± 1.94    | 7.81 ± 1.71    | .945     |       |             |
| Thrombocytes (10E9/l)                         | 289.44 ± 82.05 | 263.71 ± 52.99 | .460     |      |       | 268.62 ± 88.80 | 258.56 ± 81.41 | .883     |       |             |
| Total cholesterol (mmol/l)                    | 4.91 ± 1.85    | 4.54 ± 0.96    | .752     |      |       | 3.76 ± 0.84    | 4.04 ± 0.92    | .239     |       |             |
| Low-density lipoprotein-cholesterol (mmol/l)  | 2.45 ± 0.69    | 2.53 ± 0.69    | .830     |      |       | 1.98 ± 0.54    | 2.19 ± 0.83    | .507     |       |             |
| High-density lipoprotein-cholesterol (mmol/l) | 1.39 ± 0.35    | 1.48 ± 0.43    | .956     |      |       | 1.13 ± 0.38    | 1.18 ± 0.39    | .557     |       |             |

|                                          |               |               |      |               |               |      |
|------------------------------------------|---------------|---------------|------|---------------|---------------|------|
| Triglycerides (mmol/l)                   | 2.21 ± 3.90   | 1.15 ± 0.24   | .402 | 1.84 ± 1.79   | 1.74 ± 1.10   | .580 |
| High-sensitive C-reactive protein (mg/l) | 2.10 ± 1.42   | 1.56 ± 1.14   | .224 | 2.54 ± 3.46   | 5.65 ± 8.66   | .149 |
| Glomerular filtration rate (μmol/l)      | 71.12 ± 14.63 | 74.10 ± 15.00 | .296 | 83.39 ± 15.92 | 80.53 ± 21.95 | .986 |

---

Abbreviations: OM, osteoid metaplasia; BMI, body mass index; LEAD, lower extremity artery disease

OM-, patients without OM

OM+, patients with OM

## Supplementary Table II

### Differences in baseline characteristics between OM groups (lowest, middle, highest) in male patients

|                                       | Lowest         | Middle         | Highest        | $p_a$ | OR   | 95%CI        | $p_b$ | OR   | 95%CI        | $p_c$ |
|---------------------------------------|----------------|----------------|----------------|-------|------|--------------|-------|------|--------------|-------|
| Area percentage of OM range (%)       |                | 0.01-0.17      | 0.18-1.43      |       |      |              |       |      |              |       |
| n=56                                  | 22 (39.3)      | 17 (30.4)      | 17 (30.4)      |       |      |              |       |      |              |       |
| Age (years)                           | 66.57 ± 7.32   | 72.32 ± 5.10   | 67.48 ± 7.89   | .977  |      |              | .306  |      |              | .667  |
| BMI (kg/m2) (n=45)                    | 27.61 ± 3.85   | 26.96 ± 3.40   | 29.71 ± 4.89   | .320  |      |              | .218  |      |              | .571  |
| Previous invasive treatments for LEAD | 13 (59.1)      | 6 (35.3)       | 5 (29.4)       | .065  |      |              | .179  |      |              | .059  |
| Severity of LEAD symptoms             |                |                |                | .067  |      |              | .091  |      |              | .030  |
| claudication                          | 17 (77.3)      | 11 (64.7)      | 7 (41.2)       |       |      |              |       |      |              |       |
| rest pain                             | 3 (13.6)       | 2 (11.8)       | 5 (29.4)       |       |      |              |       |      |              |       |
| ischemic ulcer or gangrene            | 2 (9.1)        | 4 (23.5)       | 5 (29.4)       |       |      |              |       |      |              |       |
| Rest pain/ulcer                       | 5 (22.7)       | 6 (35.3)       | 10 (58.8)      | .022  | 4.86 | 1.212-19.466 | .030  | 3.64 | 1.105-11.969 | .023  |
| Ankle brachial index (n=48)           | 0.46 ± 0.18    | 0.47 ± 0.21    | 0.45 ± 0.26    | .409  |      |              | .414  |      |              | .473  |
| Toe pressure (mmHg) (n=47)            | 48.47 ± 22.20  | 49.29 ± 19.21  | 36.07 ± 15.10  | .043  |      |              | .022  |      |              | .067  |
| Riskfactors                           |                |                |                |       |      |              |       |      |              |       |
| Smoking status (n=55)                 |                |                |                | .501  |      |              | .365  |      |              | .531  |
| Never                                 | 0 (0.0)        | 0 (0.0)        | 0 (0.0)        |       |      |              |       |      |              |       |
| Current smoker                        | 8 (36.4)       | 5 (31.3)       | 8 (47.1)       |       |      |              |       |      |              |       |
| ex- smoker                            | 14 (63.6)      | 11 (68.8)      | 9 (52.9)       |       |      |              |       |      |              |       |
| Diabetic                              | 10 (45.5)      | 8 (47.1)       | 7 (41.2)       | .789  |      |              | .730  |      |              | .805  |
| Hypertensive                          | 17 (77.3)      | 15 (88.2)      | 16 (94.1)      | .206  |      |              | .412  |      |              | .134  |
| Dyslipidemia (n=55)                   | 20 (90.9)      | 16 (94.1)      | 16 (100.0)     | .499  |      |              | .548  |      |              | .232  |
| Coronary artery disease               | 6 (27.3)       | 7 (41.2)       | 7 (41.2)       | .361  |      |              | .573  |      |              | .353  |
| Cerebrovascular disease               | 1 (4.5)        | 1 (5.9)        | 2 (11.8)       | .570  |      |              | .577  |      |              | .400  |
| Medications                           |                |                |                |       |      |              |       |      |              |       |
| ACE inhibitors/ ATR blockers          | 16 (72.7)      | 15 (88.2)      | 14 (82.4)      | .704  |      |              | 1.000 |      |              | .418  |
| Aspirin                               | 17 (77.3)      | 11 (64.7)      | 12 (70.6)      | .721  |      |              | 1.000 |      |              | .614  |
| Clopidogrel                           | 1 (4.5)        | 1 (5.9)        | 0 (0.0)        | .590  |      |              | 1.000 |      |              | .480  |
| Statins                               | 16 (72.7)      | 13 (76.5)      | 11 (64.7)      | 1.000 |      |              | .527  |      |              | .614  |
| Warfarin                              | 1 (4.5)        | 3 (17.6)       | 1 (5.9)        | 1.000 |      |              | 1.000 |      |              | .803  |
| Haemoglobin (g/l) (n=55)              | 140.76 ± 15.57 | 139.41 ± 2.26  | 143.71 ± 15.57 | .681  |      |              | .642  |      |              | .670  |
| Total leukocyte count (10E9/l) (n=55) | 8.03 ± 1.94    | 7.89 ± 1.70    | 7.72 ± 1.76    | .803  |      |              | .927  |      |              | .994  |
| Thrombocytes (10E9/l) (n=55)          | 268.62 ± 88.80 | 260.65 ± 86.55 | 256.47 ± 78.55 | .769  |      |              | .709  |      |              | .975  |
| Total cholesterol (mmol/l) (n=56)     | 3.76 ± 0.84    | 3.97 ± 1.12    | 4.12 ± 0.69    | .098  |      |              | .127  |      |              | .145  |

|                                                      |               |               |               |      |      |      |
|------------------------------------------------------|---------------|---------------|---------------|------|------|------|
| Low-density lipoprotein-cholesterol (mmol/l) (n=56)  | 1.98 ± 0.54   | 2.18 ± 1.06   | 2.19 ± 0.54   | .256 | .296 | .381 |
| High-density lipoprotein-cholesterol (mmol/l) (n=56) | 1.13 ± 0.38   | 1.20 ± 0.36   | 1.17 ± 0.43   | .944 | .859 | .734 |
| Triglycerides (mmol/l) (n=56)                        | 1.84 ± 1.79   | 1.55 ± 0.65   | 1.94 ± 1.41   | .453 | .417 | .433 |
| High-sensitive C-reactive protein (mg/l) (n=56)      | 2.54 ± 3.46   | 5.45 ± 8.99   | 5.85 ± 8.59   | .223 | .349 | .150 |
| Glomerular filtration rate (μmol/l) (n=55)           | 83.39 ± 15.92 | 73.38 ± 23.50 | 87.68 ± 18.25 | .352 | .122 | .425 |

<sup>a</sup> highest vs lowest group

<sup>b</sup> highest vs middle + lowest groups

<sup>c</sup> Linear-by-Linear association for categorical variables and Jonckheere-Terpstra test for trend for continuous variables

Abbreviations: OM, osteoid metaplasia; BMI, body mass index; LEAD, lower extremity artery disease



### Supplementary Table III

#### Differences in baseline characteristics between OM groups (lowest, middle, highest) in female patients

|                                                     | Lowest         | Middle         | Highest        | $p_a$ | OR | 95%CI | $p_b$ | OR | 95%CI | $p_c$ |
|-----------------------------------------------------|----------------|----------------|----------------|-------|----|-------|-------|----|-------|-------|
| Area percentage of OM range (%)                     |                | 0.05-0.23      | 0.24-2.32      |       |    |       |       |    |       |       |
| n=34                                                | 17 (50.0)      | 8 (23.5)       | 9 (26.5)       |       |    |       |       |    |       |       |
| Age (years)                                         | 71.87 ± 7.02   | 70.82 ± 7.01   | 70.86 ± 3.94   | .634  |    |       | .788  |    |       | .685  |
| BMI (kg/m <sup>2</sup> ) (n=29)                     | 23.52 ± 3.92   | 25.54 ± 3.55   | 23.26 ± 4.90   | .842  |    |       | .594  |    |       | .585  |
| Previous invasive treatments for LEAD               | 6 (35.3)       | 3 (37.5)       | 7 (77.8)       | .097  |    |       | .052  |    |       | .055  |
| Severity of LEAD symptoms                           |                |                |                | NS    |    |       | NS    |    |       | .946  |
| claudication                                        | 11 (64.7)      | 5 (62.5)       | 6 (66.7)       |       |    |       |       |    |       |       |
| rest pain                                           | 4 (23.5)       | 2 (25.0)       | 2 (22.2)       |       |    |       |       |    |       |       |
| ischemic ulcer or gangrene                          | 2 (11.8)       | 1 (12.5)       | 1 (11.1)       |       |    |       |       |    |       |       |
| Rest pain/ulcer                                     | 6 (35.3)       | 3 (37.5)       | 3 (33.3)       | 1.000 |    |       | 1.000 |    |       | .941  |
| Ankle brachial index (n=28)                         | 0.36 ± 0.10    | 0.46 ± 0.12    | 0.38 ± 0.12    | .769  |    |       | .959  |    |       | .447  |
| Toe pressure (mmHg) (n=29)                          | 38.25 ± 24.20  | 52.40 ± 14.88  | 43.50 ± 13.90  | .172  |    |       | .487  |    |       | .109  |
| Riskfactors                                         |                |                |                |       |    |       |       |    |       |       |
| Smoking status (n=33)                               |                |                |                | NS    |    |       | NS    |    |       | .430  |
| Never                                               | 3 (18.8)       | 1 (12.5)       | 0 (0.0)        |       |    |       |       |    |       |       |
| Current smoker                                      | 8 (50.0)       | 4 (50.0)       | 6 (66.7)       |       |    |       |       |    |       |       |
| ex- smoker                                          | 5 (31.3)       | 3 (37.5)       | 3 (33.3)       |       |    |       |       |    |       |       |
| Diabetic                                            | 0 (0.0)        | 4 (50.0)       | 2 (22.2)       | .111  |    |       | .644  |    |       | .073  |
| Hypertensive                                        | 14 (82.4)      | 7 (87.5)       | 7 (77.8)       | 1.000 |    |       | .644  |    |       | .828  |
| Dyslipidemia (n=)                                   | 14 (82.4)      | 8 (100.0)      | 7 (77.8)       | 1.000 |    |       | .591  |    |       | .920  |
| Coronary artery disease                             | 6 (35.3)       | 4 (50.0)       | 1 (11.1)       | .357  |    |       | .214  |    |       | .301  |
| Cerebrovascular disease                             | 2 (11.8)       | 1 (12.5)       | 1 (11.1)       | 1.000 |    |       | 1.000 |    |       | .971  |
| Medications                                         |                |                |                |       |    |       |       |    |       |       |
| ACE inhibitors/ ATR blockers                        | 10 (58.8)      | 6 (75.0)       | 6 (66.7)       | 1.000 |    |       | 1.000 |    |       | .621  |
| Aspirin                                             | 12 (70.6)      | 7 (87.5)       | 6 (66.7)       | 1.000 |    |       | .670  |    |       | .957  |
| Clopidogrel                                         | 2 (11.8)       | 2 (25.0)       | 4 (44.4)       | 1.000 |    |       | .165  |    |       | .066  |
| Statins                                             | 11 (64.7)      | 7 (87.5)       | 6 (66.7)       | .138  |    |       | 1.000 |    |       | .776  |
| Warfarin                                            | 0 (0.0)        | 0 (0.0)        | 0 (0.0)        | -     |    |       | -     |    |       | -     |
| Haemoglobin (g/l) (n=33)                            | 133.75 ± 11.98 | 131.13 ± 5.19  | 130.22 ± 9.12  | .452  |    |       | .486  |    |       | .370  |
| Total leukocyte count (10E9/l) (n=33)               | 8.11 ± 2.10    | 8.01 ± 1.35    | 7.92 ± 1.71    | .846  |    |       | .736  |    |       | .748  |
| Thrombocytes (10E9/l) (n=33)                        | 289.44 ± 82.05 | 266.25 ± 53.36 | 261.44 ± 55.79 | .419  |    |       | .538  |    |       | .685  |
| Total cholesterol (mmol/l) (n=32)                   | 4.19 ± 1.85    | 4.47 ± 1.04    | 4.59 ± 0.95    | 1.000 |    |       | .869  |    |       | .873  |
| Low-density lipoprotein-cholesterol (mmol/l) (n=31) | 2.45 ± 0.69    | 2.37 ± 1.14    | 2.66 ± 0.92    | .770  |    |       | .593  |    |       | .941  |



|                                                         |               |               |               |      |      |      |
|---------------------------------------------------------|---------------|---------------|---------------|------|------|------|
| High-density lipoprotein-cholesterol (mmol/l)<br>(n=32) | 1.39 ± 0.35   | 1.51 ± 0.55   | 1.46 ± 0.35   | .934 | .934 | .943 |
| Triglycerides (mmol/l) (n=32)                           | 2.21 ± 3.90   | 1.26 ± 0.22   | 1.07 ± 0.23   | .207 | .122 | .183 |
| High-sensitive C-reactive protein (mg/l) (n=32)         | 2.10 ± 1.42   | 1.25 ± 0.75   | 1.80 ± 1.37   | .598 | .902 | .347 |
| Glomerular filtration rate (μmol/l) (n=33)              | 71.12 ± 14.63 | 74.03 ± 16.76 | 74.16 ± 14.29 | .388 | .564 | .345 |

<sup>a</sup> highest vs lowest group

<sup>b</sup> highest vs middle + lowest groups

<sup>c</sup> Linear-by-Linear association for categorical variables and Jonckheere-Terpstra test for trend for continuous variables

Abbreviations: OM, osteoid metaplasia; BMI, body mass index; LEAD, lower extremity artery disease
